# Causal association of long COVID with brain structure changes: Findings from a 2-sample Mendelian randomization study

Hui Li<sup>1</sup>, Yihe Yang<sup>2</sup>, Pingjian Ding<sup>1</sup>, and Rong Xu<sup>1,\*</sup>

<sup>1</sup>Center For Artificial Intelligence in Drug Discovery, Sears Tower T304, School of Medicine, Case Western Reserve University, 10900 Euclid Avenue, Cleveland, OH 44106, United States of America

<sup>2</sup>Department of Population and Quantitative Health Sciences, Case Western Reserve University, Cleveland, Ohio, USA

\*Corresponding author: [rxx@case.edu](mailto:rxx@case.edu)

## Abstract

Nearly 7.5% U.S. adults have long COVID. Recent epidemiological studies indicated that long COVID, is significantly associated with subsequent brain structure changes. However, it remains unknown if long COVID is causally associated with brain structure change. Here we applied two Mendelian Randomization (MR) methods – Inverse Variance Weighting MR method (IVW) for correlated instrument variables and Component analysis-based Generalized Method of Moments (PC-GMM) – to examine the potential causal relationships from long COVID to brain structure changes. The MR study was based on an instrumental variable analysis of data from a recent long COVID genome-wide association study (GWAS) (3,018 cases and 994,582 controls), the Enhancing NeuroImaging Genetics through Meta Analysis (ENIGMA) (Global and regional cortical measures, N = 33,709; combined hemispheric subcortical volumes, N = 38,851), and UK Biobank (left/right subcortical volumes, N = 19,629). We found no significant causal relationship between long COVID and brain structure changes. As we gain more insights into long COVID and its long-term health outcomes, future works are necessary to validate our findings and understand the mechanisms underlying the observed associations, though not causal, of long COVID with subsequent brain structure changes.

**Keywords:** brain structure, causal association, *cis*-Mendelian Randomization, long COVID

**NOTE:** This preprint reports new research that has not been certified by peer review and should not be used to guide clinical practice.

# 1. Introduction

According to data from National Center for Health Statistics in 2022, about 7.5% of U.S. adults were living with long COVID, also known as post COVID-19 condition or post-acute sequelae of COVID-19 (PASC) [1]. Long COVID is currently defined by World Health Organization as a range of symptoms that present after COVID-19 and persist after 3 months [2, 3]. Neuropsychiatric symptoms including depression, anxiety and cognitive deficits have been widely reported as symptoms in patients with long COVID across the severity spectrum of this respiratory disease [3, 4, 5]. Direct viral infection of the central nervous system [6, 7], or prolonged neuroinflammation [8] have been proposed as potential underlying mechanisms. Recent studies suggest that brain structure abnormalities are involved in long covid associated neuropsychiatric symptoms. Heine et al. [9] carried out a prospective cross-sectional observational study and showed that the volumes of the left thalamus, putamen and pallidum for long COVID with fatigue decreased. Michael et al. [3] implemented a prospective, national longitudinal study to investigate the pathophysiology and recovery trajectory of persistent long COVID cognitive deficits and found reduced anterior cingulate cortex volume one year after admission. These studies showed that long COVID was associated with subsequent brain structure changes. However, due to the inherent challenges related to confounding variables and reverse causation in epidemiological observational studies, it remains unknown whether long COVID leads to brain structure changes.

Mendelian randomization (MR) is a useful tool to investigate causal relationship. It utilizes genetic variants as instrument variables to randomly allocate an exposure and estimate the causal relationship of the exposure on an outcome. Recently Ding and Xu [10] carried out a large-scale MR study and showed that COVID-19 infection and severity were not causally associated with brain structure. Meanwhile, Zhou et al. [11] showed nominally significant causal effect of COVID-19 infection, hospitalized COVID-19 and severe COVID-19 on specific brain structures. Currently, it remains unknown if long COVID is causally associated with subsequent brain structure changes. Genetic susceptibility of long COVID is different from COVID. Specifically, the genome-wide significant SNPs in long COVID [2] are not genome-wide significant in GWAS for COVID infection (N=1,348,701) and COVID severity (N=1,557,411)(<https://www.covid19hg.org/results/r5/>) [10]. Most COVID patients recover within 3 months and only a subset of them continue to have long COVID, approximately 14% to 43% [12, 13, 14]. Therefore, in this study we aim to investigate the causal relationship of long COVID with brain structure change including both cortical and subcortical brain structures.

## 2. Method 65

### 2.1 Datasets 66

In this study, we used GWAS summary statistics of long COVID [2] (N = 3,018 for 67 cases and 994,582 for controls, available from [https://www.medrxiv.org/node/671137. 68 external-links.html](https://www.medrxiv.org/node/671137.external-links.html)) and GWAS summary statistics of brain structure (global and re- 69 gional cortices [15], N = 33,709, available from [http://enigma.ini.usc.edu/research/ 70 download-enigma-gwas-results](http://enigma.ini.usc.edu/research/download-enigma-gwas-results); combined hemispheric subcortical regions [16], N = 71 38,851, available from [http://enigma.ini.usc.edu/research/download-enigma-gwas-r esults](http://enigma.ini.usc.edu/research/download-enigma-gwas-results); 72 and left/right subcortices [17], N = 19,629, available from [https://github.com/BIG-S2/ 73 GWAS](https://github.com/BIG-S2/GWAS)). More details are in Supplementary Table 1. 74

For long COVID GWAS, we used the strict broad case control meta analysis between 75 long COVID patients with an earlier test-verified severe acute respiratory syndrome 76 coronavirus 2 (SARS-CoV-2) infection (i.e. strict cases) and genetically ancestry-matched 77 population controls without known long COVID (i.e. broad controls). Long COVID was 78 defined as patients with any symptoms that present after COVID-19 infection and persist 79 after three months. The most common symptoms were fatigue, anosmia, shortness of 80 breath, persistent cough and problems with memory and concentration. 81

The GWAS investigations of brain structures were conducted with participants in EN- 82 IGMA and UK Biobank. The outcome measures include surface area and thickness of the 83 global and 34 regional cortices [15] as well as volumes of 7 combined hemispheric [16] and 84 17 left/right subcortices [17], which are specifically amygdala, hippocampus, accumbens, 85 putamen, pallidum, thalamus, insula, caudate, and brain stem. Included GWAS studies 86 have obtained ethical approval from the corresponding ethics review boards. 87

### 2.2 Two sample *cis*-MR 88

Two *cis*-MR methods were adopted – IVW for correlated instrument variables [18] and 89 PCGMM [19]. In total 16 Instrument variables within 3Mb around the identified lead vari- 90 ant rs9367106 in the long COVID GWAS study [2] were selected with p-value threshold 91 of  $5 \times 10^{-6}$ . To avoid numerically unstable causal effect estimate in the IVW method [20], 92 LD clumping [21] was used to select informative SNPs and remove other correlated SNPs 93 with  $r^2 > 0.8$  within a window size of  $\frac{100}{r^2}$  where  $r^2 = 0.8$ . The window size was set based 94 on the recommendation of the snp clumping in the “bigsnpr” package [22]. For both IVW 95 and PCGMM, we searched appropriate proxies for those instrument SNPs not available in 96 the brain structure outcome datasets with  $r^2 = 0.6$ ; we also harmonized long COVID and 97 brain structure data and removed palindromic SNPs with minor allele frequency above 98 0.42 (see Supplementary Tables 2-4 for proxy SNPs and harmonized GWAS summary 99 statistics for exposure and outcome.). For ivw, 3 informative SNPs were selected. Ac- 100

ording to PheWeb (<https://pheweb.org/UKB-SAIGE/about>) [23] and GWAS Catalog [24], none of the 3 instrument variables had pleiotropy effects through other risk factors. The `mr_ivw` function from MendelianRandomization package [18] was applied for ivw analysis. For PCGMM, we utilized the “`mr_pcgmm`” function from the MendelianRandomization package. As recommended by the function, LD clumping was carried out with parameter  $r^2 > 0.95$  within a window size of  $\frac{100}{r^2}$  where  $r^2 = 0.95$ . In total 4 SNPs were selected and based on PheWeb and GWAS Catalog, none of them were genome-wide significantly associated with pleiotropy risk factors. The selected 4 instrument SNPs were linearly combined and the first 2 principle components which explained 99% variance of the genetic data were chosen. For both ivw and pcgmm, F statistic was larger than 10, suggesting no weak instruments (see Supplementary Table 5) [25, 26].

### 2.3 MR multiple testing correction procedures

We accounted for multiple testing by defining significance at a false discovery rate (FDR) of 0.05. We performed separate FDR corrections for each subgroup of brain structure MR analyses [27] using Benjamini–Hochberg procedure [28]. Specially, the subgroups are: 1) long COVID on global cortical brain structures, 2) long COVID on regional cortical brain structures, 3) long COVID on hemispheric combined subcortical brain structures, 4) long COVID on left/right subcortical brain structures. The corrected Pvalue = original Pvalue  $\times \frac{m}{k}$ , where m is the number of MR analyses in each subgroup and k is the rank of pvalue in a ascending order in that subgroup.

## 3. Results

Among the 94 brain structure summary statistics datasets (Sec. 2.1), the 7 combined subcortical volume datasets were excluded because only one instrument variable exists in the outcome datasets, even after proxy searching (Sec. 2.2). For the remaining 87 outcome datasets, we found no significant causal relationship between long COVID with brain structure changes in global cortex (Table 1), regional cortex (Figure 1B) and left/right subcortex (Table 1) under the control of  $FDR < 0.05$  for each sugroup (see Section MR multiple testing correction procedures ), i.e. the corrected Pvalue after FDR correction is larger than the significance threshold 0.05 for the surface area/thickness/volume of each specific brain region.

The null conclusion is consistent between IVW and PCGMM methods. Specifically, the sign of the causal effect estimates/z scores are mostly the same between IVW and PCGMM and the size of the causal effect estimates/z scores are largely similar (Table 1 for global cortices and left/right subcortices and Figure 1A for regional cortices), given that the two methods both work well.

**Table 1. MR analysis for causal relationship of long COVID on global cortical and left/right subcortical brain structure changes.** Both IVW and PCGMM show that long COVID is not causally associated with global cortical and left/right subcortical brain structure changes (i.e. corrected Pvalue > 0.05).

| Outcome                       | IVW      |          |                  |        |                    | PCGMM    |          |                  |        |                  |
|-------------------------------|----------|----------|------------------|--------|--------------------|----------|----------|------------------|--------|------------------|
|                               | SNPs num | Estimate | 95% CI           | Pvalue | Corrected Pvalue * | SNPs num | Estimate | 95% CI           | Pvalue | Corrected Pvalue |
| global cortex                 |          |          |                  |        |                    |          |          |                  |        |                  |
| surface area                  | 3        | -0.150   | (-0.286, -0.014) | 0.031  | 0.062              | 4        | -0.184   | (-0.346, -0.021) | 0.027  | 0.053            |
| thickness                     | 3        | 0.002    | (-0.132, 0.136)  | 0.976  | 0.976              | 4        | 0.023    | (-0.127, 0.173)  | 0.768  | 0.768            |
| left/right subcortical volume |          |          |                  |        |                    |          |          |                  |        |                  |
| left.hippocampus.pheno81      | 3        | -0.130   | (-0.288, 0.028)  | 0.107  | 1.000              | 4        | -0.156   | (-0.342, 0.029)  | 0.098  | 1.000            |
| Brain.stem.pheno68            | 3        | 0.121    | (-0.037, 0.279)  | 0.133  | 1.000              | 4        | 0.143    | (-0.371, 0.657)  | 0.585  | 1.000            |
| right.hippocampus.pheno94     | 3        | -0.121   | (-0.279, 0.037)  | 0.134  | 0.757              | 4        | -0.145   | (-0.329, 0.04)   | 0.124  | 1.000            |
| right.amygdala.pheno95        | 3        | -0.079   | (-0.237, 0.079)  | 0.327  | 1.000              | 4        | -0.075   | (-0.302, 0.212)  | 0.608  | 1.000            |
| left.accumbens.area.pheno83   | 3        | 0.078    | (-0.08, 0.236)   | 0.331  | 1.000              | 4        | 0.071    | (-0.57, 0.712)   | 0.828  | 1.000            |
| right.accumbens.area.pheno96  | 3        | 0.064    | (-0.094, 0.222)  | 0.427  | 1.000              | 4        | 0.007    | (-0.172, 0.186)  | 0.941  | 1.000            |
| left.thalamus.proper.pheno77  | 3        | 0.059    | (-0.099, 0.217)  | 0.464  | 1.000              | 4        | 0.047    | (-0.132, 0.227)  | 0.604  | 1.000            |
| right.thalamus.proper.pheno90 | 3        | 0.056    | (-0.103, 0.214)  | 0.491  | 1.000              | 4        | 0.005    | (-0.487, 0.497)  | 0.984  | 0.984            |
| left.caudate.pheno78          | 3        | -0.043   | (-0.202, 0.115)  | 0.593  | 1.000              | 4        | -0.104   | (-0.405, 0.198)  | 0.500  | 1.000            |
| right.caudate.pheno91         | 3        | -0.031   | (-0.19, 0.127)   | 0.698  | 1.000              | 4        | -0.071   | (-0.252, 0.11)   | 0.440  | 1.000            |
| left.amygdala.pheno82         | 3        | 0.030    | (-0.128, 0.188)  | 0.707  | 1.000              | 4        | 0.018    | (-0.273, 0.309)  | 0.904  | 1.000            |
| right.putamen.pheno92         | 3        | -0.027   | (-0.185, 0.131)  | 0.739  | 1.000              | 4        | -0.011   | (-0.195, 0.174)  | 0.910  | 1.000            |
| left.pallidum.pheno80         | 3        | -0.025   | (-0.183, 0.133)  | 0.754  | 0.986              | 4        | -0.099   | (-0.866, 0.667)  | 0.800  | 1.000            |
| right.insula.pheno62          | 3        | 0.020    | (-0.138, 0.178)  | 0.807  | 0.980              | 4        | 0.051    | (-0.129, 0.23)   | 0.580  | 1.000            |
| left.insula.pheno31           | 3        | -0.019   | (-0.178, 0.139)  | 0.809  | 0.917              | 4        | 0.011    | (-0.168, 0.19)   | 0.904  | 1.000            |
| right.pallidum.pheno93        | 3        | 0.018    | (-0.14, 0.176)   | 0.826  | 0.877              | 4        | 0.002    | (-0.177, 0.181)  | 0.982  | 1.000            |
| left.putamen.pheno79          | 3        | 0.009    | (-0.15, 0.167)   | 0.916  | 0.916              | 4        | 0.009    | (-0.17, 0.188)   | 0.924  | 1.000            |

\* Corrected Pvalue means Pvalue after multiple testing correction (see Section [MR multiple testing correction procedures](#) ).

**A Z Score of IVW and PCGMM for regional cortical surface area and thickness**

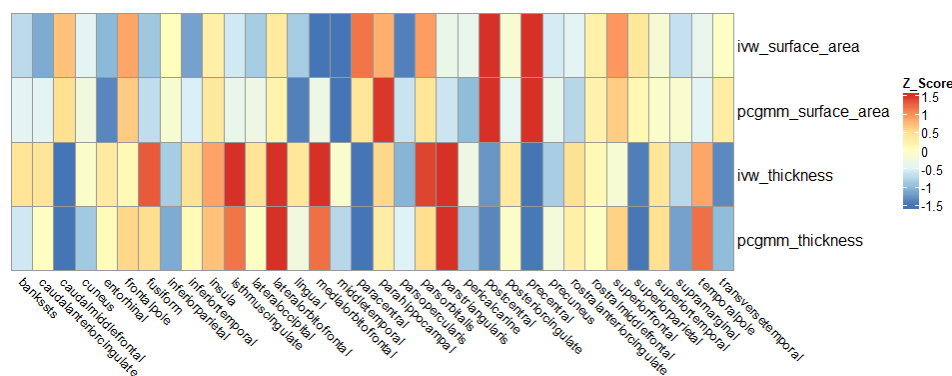

**B Corrected Pvalue of IVW and PCGMM for regional cortical surface area and thickness**

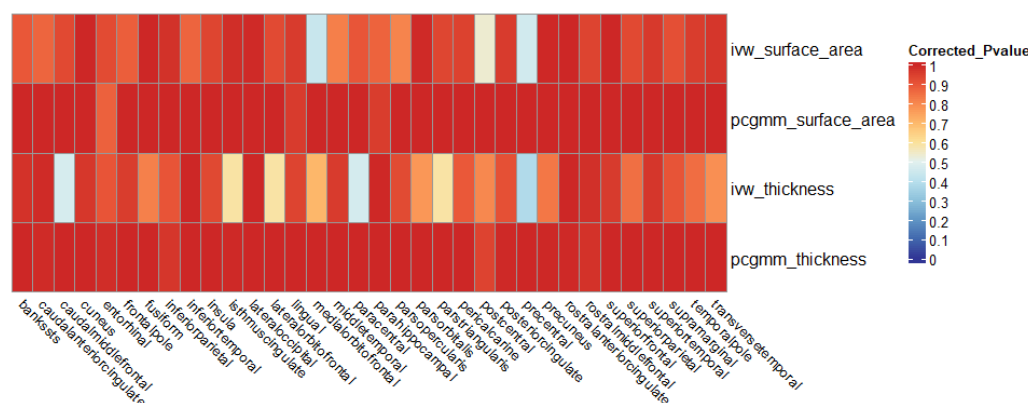

**Figure 1. MR analysis for causal relationship of long COVID on regional cortical brain structure changes.** Panel A shows the Z score of the IVW and PCGMM analysis for the causal relationship between long COVID and regional cortices, for both surface area and thickness. Panel B shows the corresponding corrected Pvalue (Section [MR multiple testing correction procedures](#) ). Generally speaking, IVW and PCGMM produces similar Z scores and corrected P values. Both methods show that long COVID is not causally associated with regional cortical brain structure changes (i.e. corrected Pvalue > 0.05).

## 4. Discussion

136

We implemented the first MR analysis to investigate the causal relationship between long COVID and brain structure changes, utilizing two cis-MR methods – IVW for correlated instruments and PCGMM. Both methods produced consistent results indicating that the genetic susceptibility of long COVID is not causally associated with brain structure changes.

Our MR analysis complements existing epidemiological observational studies and suggests that brain structure changes due to long COVID are dynamic and temporal. Recent epidemiological observational studies suggest long COVID is significantly associated with subsequent brain structure changes in specific brain regions. Heine et al. [9] showed decreased volumes of some subcortical brain regions for long COVID patients with fatigue. Michael et al. [3] found reduced volume for anterior cingulate cortex for long COVID patients one year after admission. However, these observational studies only report brain structure changes in a relatively short period after the acute SARS-CoV-2 infection, such as a median 7.5 months with inter-quartile range (first and third quartiles) 6.5–9.2 months [9] or one year after admission to hospital [3]. In contrast, MR estimates reflect a lifelong effect of genetic susceptibility of long COVID on brain structure changes. And there are epidemiological studies suggesting that some brain structure changes due to long COVID were discovered to recover. For example, Tian et al. [29] observed the dynamic brain changes from 3 to 10 months after discharge from hospital for 34 COVID patients and found that the cortical thickness were dynamic and finally returned to baseline. Du et al. [30] observed brain structure changes of COVID survivors at 1 year and 2 years after discharge from hospital and found that the decreased GMVs in the left middle frontal gyrus, inferior frontal gyrus of the operculum, right middle temporal gyrus, and inferior temporal gyrus returned to normal at two years.

Our findings about causal relationship between long COVID and brain structure changes is consistent with existing MR analyses between COVID and brain structure changes. Ding and Xu [10] showed that COVID-19 infection and severity were not causally associated with brain structure in a large-scale MR analysis. The GWAS samples for the exposure and outcome in this study are not overlapped. Bias due to weak instruments in a non-overlapping two-sample MR analysis is in the direction of the null and thus false positive findings can be avoided [31, 32]. Although Zhou et al. [11] proposed causal effect of COVID-19 infection, hospitalized COVID-19 and severe COVID-19 on specific brain structures, their results are only nominally significant.

Our study has limitations. First, there would be misclassification for a binary exposure (i.e. long COVID in this investigation) and collider bias “SARS-CoV-2 infection” may be present when analyzing long COVID cases with an earlier test-verified SARS-CoV-2 infection. Second, currently the only available GWAS study [2] for long COVID recruited

patients with all symptoms rather than a specific symptom such as the neuropsychiatric symptom or fatigue. The selection criteria for symptoms matter because the brain structures are more likely to change for long COVID with neuropsychiatric symptom or fatigue than long COVID with symptoms less related to brain such as short of breath, or cough. Third, we did not examine the causal effects of long COVID on brain structures in subgroups stratified by age, gender, or comorbidities due to the lack of such GWAS data. Fourth, the GWAS summary statistics for both long COVID and brain structure changes in this study were primarily for individuals of European ancestry. The causal associations of long COVID and brain structure changes for ethnic and racial minorities in the US are important because they were disproportionately affected by the pandemic [33].

To validate our findings in the future, new large-scale GWAS studies for long COVID are necessary such as for a specific brain-related symptom of long COVID. GWAS studies of test-verified SARS-CoV-2 are needed for collider bias analysis if long COVID confirmation is conditioning on earlier test verification of COVID infection [34]. Epidemiological observational studies with much longer longitudinal follow-up periods are also recommended to investigate the long-term dynamic change of brain structure after COVID infection. Meanwhile, identifying the contributing factors for the temporal brain structure changes are also important since these factors are modifiable compared with genetic susceptibility and they could potentially be therapeutic targets to reverse the brain structure damage from long COVID earlier.

Taken together the complementary evidence from both epidemiological and MR studies, long-COVID is associated with subsequent brain structure changes. However this dynamic and temporal association relationship might be mediated by modifiable factors such as inflammation trigger by COVID infection [35, 36] other than genetic susceptibility. Targeting those modifiable mediators could potentially reverse the brain structure damage from long COVID. Future works are necessary to validate our findings and understand the underlying mechanisms of the association relationship between long COVID and subsequent brain structure changes.

## Author Contributions 203

R.X. conceptualized the study. H.L. , P.J.D. , Y.H.Y. designed the study. H.L. performed all experiments and wrote the manuscript. All authors critically contributed to the result interpretation and manuscript preparation. All authors read and approved the final manuscript. 204  
205  
206  
207

## Ethics approval statement 208

This study relied on multiple publicly available GWAS summary statistics on long COVID 209  
and subcortical brain structure. Ethical approval was obtained in all original studies. 210

## Data availability 211

All the summary statistics in this study can be obtained from the original genome-wide 212  
association studies. Any other data generated during the analysis can be requested from 213  
the authors. 214

## Declaration of Competing Interest 215

The authors declare no conflicts of interest. 216

## Acknowledgments 217

The authors thank the participants from all cohorts who contributed to this study; and 218  
we are indebted to Dr. Xiaofeng Zhu for valuable discussions and suggestions. This 219  
work has been supported by NIH National Institute of Aging, USA R01 AG057557, R01 220  
AG061388, R56 AG062272, National Institute on Alcohol Abuse and Alcoholism, USA 221  
(grant no. R01AA029831). This work was also partially supported by grant HG011052 222  
and HG011052-03S1 from the National Human Genome Research Institute (NHGRI), 223  
USA. 224

## References 225

1. Centers for Disease Control, Prevention, et al. Nearly one in five american adults 226  
who have had covid-19 still have “long covid”. *National Center for Health Statistics.* 227  
[https://www.cdc.gov/nchs/press room/nchs\\_press\\_releases/2022/20220622](https://www.cdc.gov/nchs/press room/nchs_press_releases/2022/20220622), 622, 228  
2022. 229
2. Vilma Lammi, Tomoko Nakanishi, Samuel E Jones, Shea J Andrews, Juha Kar- 230  
jalainen, Beatriz Cortés, Heath E O’Brien, Brian E Fulton-Howard, Hele H 231  
Haapaniemi, Axel Schmidt, et al. Genome-wide association study of long covid. 232  
*medRxiv*, pages 2023–06, 2023. 233
3. Benedict Michael, Greta Wood, Brendan Sargent, Kukatharamini Tharmaratnam, 234  
Cordelia Dunai, Franklyn Egbe, Naomi Martin, Bethany Facer, Sophie Pendered, 235



- Henry Rogers, et al. Post-covid cognitive deficits at one year are global and associated with elevated brain injury markers and grey matter volume reduction: national prospective study. *Research Square*, 2024. 236  
237  
238
4. Adam Hampshire, William Trender, Samuel R Chamberlain, Amy E Jolly, Jon E Grant, Fiona Patrick, Ndaba Mazibuko, Steve CR Williams, Joseph M Barnby, Peter Hellyer, et al. Cognitive deficits in people who have recovered from covid-19. *EClinicalMedicine*, 39, 2021. 239  
240  
241  
242
  5. Vasiliki Efstathiou, Maria-Ioanna Stefanou, Marina Demetriou, Nikolaos Siafakas, Michael Makris, Georgios Tsivgoulis, Vassilios Zoumpourlis, Stylianos P Kypourpoulos, James N Tsoporis, Demetrios A Spandidos, et al. Long covid and neuropsychiatric manifestations. *Experimental and Therapeutic Medicine*, 23(5):1–12, 2022. 243  
244  
245  
246
  6. Jenny Meinhardt, Josefine Radke, Carsten Dittmayer, Jonas Franz, Carolina Thomas, Ronja Mothes, Michael Laue, Julia Schneider, Sebastian Brünink, Selina Greuel, et al. Olfactory transmucosal sars-cov-2 invasion as a port of central nervous system entry in individuals with covid-19. *Nature neuroscience*, 24(2):168–175, 2021. 247  
248  
249  
250
  7. Sydney R Stein, Sabrina C Ramelli, Alison Grazioli, Joon-Yong Chung, Manmeet Singh, Claude Kwe Yinda, Clayton W Winkler, Junfeng Sun, James M Dickey, Kris Ylaya, et al. Sars-cov-2 infection and persistence in the human body and brain at autopsy. *Nature*, 612(7941):758–763, 2022. 251  
252  
253  
254
  8. Michelle Monje and Akiko Iwasaki. The neurobiology of long covid. *Neuron*, 110(21): 3484–3496, 2022. 255  
256
  9. Josephine Heine, Katia Schwichtenberg, Tim J Hartung, Sophia Rekers, Claudia Chien, Fabian Boesl, Rebekka Rust, Christian Hohenfeld, Julia Bungenberg, Ana S Costa, et al. Structural brain changes in patients with post-covid fatigue: a prospective observational study. *EClinicalMedicine*, 58, 2023. 257  
258  
259  
260
  10. Pingjian Ding and Rong Xu. Causal association of covid-19 with brain structure changes: Findings from a non-overlapping 2-sample mendelian randomization study. *Journal of the Neurological Sciences*, 454:120864, 2023. 261  
262  
263
  11. Shaojiong Zhou, Tao Wei, Xiaoduo Liu, Yufei Liu, Weiyi Song, Xinwei Que, Yi Xing, Zhibin Wang, and Yi Tang. Causal effects of covid-19 on structural changes in specific brain regions: a mendelian randomization study. *BMC medicine*, 21(1):261, 2023. 264  
265  
266
  12. Stijn Roggeman, Berenice Gabriela Jimenez Garcia, Lynn Leemans, Joy Demol, Janne Geers, Ann De Smedt, Koen Putman, Marc Schiltz, David Beckwée, and Elisabeth De Waele. Functional performance recovery after individualized nutrition therapy combined with a patient-tailored physical rehabilitation program versus standard 267  
268  
269  
270

- physiotherapy in patients with long covid: a pilot study. *Pilot and Feasibility Studies*, 9(1):166, 2023. 271  
272
13. Anouk W Vaes, Yvonne MJ Goërtz, Maarten Van Herck, Felipe VC Machado, Roy 273  
Meys, Jeannet M Delbressine, Sarah Houben-Wilke, Svetlana Gaffron, Dieter Maier, 274  
Chris Burtin, et al. Recovery from covid-19: a sprint or marathon? 6-month follow- 275  
up data from online long covid-19 support group members. *ERJ open research*, 7(2), 276  
2021. 277
14. Yvonne MJ Goërtz, Maarten Van Herck, Jeannet M Delbressine, Anouk W Vaes, 278  
Roy Meys, Felipe VC Machado, Sarah Houben-Wilke, Chris Burtin, Rein Posthuma, 279  
Frits ME Franssen, et al. Persistent symptoms 3 months after a sars-cov-2 infection: 280  
the post-covid-19 syndrome? *ERJ open research*, 6(4), 2020. 281
15. Katrina L Grasby, Neda Jahanshad, Jodie N Painter, Lucía Colodro-Conde, Janita 282  
Bralten, Derrek P Hibar, Penelope A Lind, Fabrizio Pizzagalli, Christopher RK Ching, 283  
Mary Agnes B McMahon, et al. The genetic architecture of the human cerebral cortex. 284  
*Science*, 367(6484):eaay6690, 2020. 285
16. Claudia L Satizabal, Hieab HH Adams, Derrek P Hibar, Charles C White, Maria J 286  
Knol, Jason L Stein, Markus Scholz, Muralidharan Sargurupremraj, Neda Jahanshad, 287  
Gennady V Roshchupkin, et al. Genetic architecture of subcortical brain structures 288  
in 38,851 individuals. *Nature genetics*, 51(11):1624–1636, 2019. 289
17. Bingxin Zhao, Tianyou Luo, Tengfei Li, Yun Li, Jingwen Zhang, Yue Shan, Xifeng 290  
Wang, Liuqing Yang, Fan Zhou, Ziliang Zhu, et al. Genome-wide association analysis 291  
of 19,629 individuals identifies variants influencing regional brain volumes and refines 292  
their genetic co-architecture with cognitive and mental health traits. *Nature genetics*, 293  
51(11):1637–1644, 2019. 294
18. Stephen Burgess, Frank Dudbridge, and Simon G Thompson. Combining information 295  
on multiple instrumental variables in mendelian randomization: comparison of allele 296  
score and summarized data methods. *Statistics in medicine*, 35(11):1880–1906, 2016. 297
19. Ashish Patel, Dipender Gill, Dmitry Shungin, Christos S Mantzoros, Lotte Bjerre 298  
Knudsen, Jack Bowden, and Stephen Burgess. Robust use of phenotypic heterogen- 299  
eity at drug target genes for mechanistic insights: Application of cis-multivariable 300  
mendelian randomization to gpl1r gene region. *Genetic Epidemiology*, 2024. 301
20. Stephen Burgess, Verena Zuber, Elsa Valdes-Marquez, Benjamin B Sun, and Jemma C 302  
Hopewell. Mendelian randomization with fine-mapped genetic data: choosing from 303  
large numbers of correlated instrumental variables. *Genetic epidemiology*, 41(8):714– 304  
725, 2017. 305

21. Amand F Schmidt, Chris Finan, Maria Gordillo-Marañón, Folkert W Asselbergs, 306  
Daniel F Freitag, Riyaz S Patel, Benoît Tyl, Sandesh Chopade, Rupert Faraway, 307  
Magdalena Zwierzyzna, et al. Genetic drug target validation using mendelian random- 308  
isation. *Nature communications*, 11(1):3255, 2020. 309
22. Alkes L Price, Michael E Weale, Nick Patterson, Simon R Myers, Anna C Need, 310  
Kevin V Shianna, Dongliang Ge, Jerome I Rotter, Esther Torres, Kent D Taylor, et al. 311  
Long-range ld can confound genome scans in admixed populations. *The American* 312  
*Journal of Human Genetics*, 83(1):132–135, 2008. 313
23. Sarah A Gagliano Taliun, Peter VandeHaar, Andrew P Boughton, Ryan P Welch, 314  
Daniel Taliun, Ellen M Schmidt, Wei Zhou, Jonas B Nielsen, Cristen J Willer, 315  
Seunggeun Lee, et al. Exploring and visualizing large-scale genetic associations by 316  
using pheweb. *Nature Genetics*, 52(6):550–552, 2020. 317
24. Jacqueline MacArthur, Emily Bowler, Maria Cerezo, Laurent Gil, Peggy Hall, Emma 318  
Hastings, Heather Junkins, Aoife McMahon, Annalisa Milano, Joannella Morales, 319  
et al. The new nhgri-ebi catalog of published genome-wide association studies (gwas 320  
catalog). *Nucleic acids research*, 45(D1):D896–D901, 2017. 321
25. Stephen Burgess, Adam Butterworth, and Simon G Thompson. Mendelian random- 322  
ization analysis with multiple genetic variants using summarized data. *Genetic epi-* 323  
*demiology*, 37(7):658–665, 2013. 324
26. Douglas O Staiger and James H Stock. Instrumental variables regression with weak 325  
instruments, 1994. 326
27. Lucas A Mavromatis, Daniel B Rosoff, Renata B Cupertino, Hugh Garavan, Scott 327  
Mackey, and Falk W Lohoff. Association between brain structure and alcohol use 328  
behaviors in adults: a mendelian randomization and multiomics study. *JAMA psy-* 329  
*chiatry*, 79(9):869–878, 2022. 330
28. Yoav Benjamini and Yosef Hochberg. Controlling the false discovery rate: a practical 331  
and powerful approach to multiple testing. *Journal of the Royal statistical society:* 332  
*series B (Methodological)*, 57(1):289–300, 1995. 333
29. Tian Tian, Jinfeng Wu, Tao Chen, Jia Li, Su Yan, Yiran Zhou, Xiaolong Peng, 334  
Yuanhao Li, Ning Zheng, Aoling Cai, et al. Long-term follow-up of dynamic brain 335  
changes in patients recovered from covid-19 without neurological manifestations. *JCI* 336  
*insight*, 7(4), 2022. 337
30. Yanyao Du, Wei Zhao, Sihong Huang, Yijie Huang, Yanjing Chen, Huiting Zhang, 338  
Hu Guo, and Jun Liu. Two-year follow-up of brain structural changes in patients 339  
who recovered from covid-19: A prospective study. *Psychiatry Research*, 319:114969, 340  
2023. 341

31. Stephen Burgess, Neil M Davies, and Simon G Thompson. Bias due to participant overlap in two-sample mendelian randomization. *Genetic epidemiology*, 40(7):597–608, 2016.
32. Stephen Burgess, George Davey Smith, Neil M Davies, Frank Dudbridge, Dipender Gill, M Maria Glymour, Fernando P Hartwig, Zoltán Kutalik, Michael V Holmes, Cosetta Minelli, et al. Guidelines for performing mendelian randomization investigations: update for summer 2023. *Wellcome open research*, 4, 2019.
33. José Manuel Aburto, Andrea M Tilstra, Ginevra Floridi, and Jennifer Beam Dowd. Significant impacts of the covid-19 pandemic on race/ethnic differences in us mortality. *Proceedings of the National Academy of Sciences*, 119(35):e2205813119, 2022.
34. Siyang Cai, April Hartley, Osama Mahmoud, Kate Tilling, and Frank Dudbridge. Adjusting for collider bias in genetic association studies using instrumental variable methods. *Genetic Epidemiology*, 46(5-6):303–316, 2022.
35. Justin J Frere, Randal A Serafini, Kerri D Pryce, Marianna Zazhytska, Kohei Oishi, Ilona Golynger, Maryline Panis, Jeffrey Zimering, Shu Horiuchi, Daisy A Hoagland, et al. Sars-cov-2 infection in hamsters and humans results in lasting and unique systemic perturbations after recovery. *Science translational medicine*, 14(664):eabq3059, 2022.
36. Bianca Besteher, Tonia Rocktäschel, Alejandra P Garza, Marlene Machnik, Johanna Ballez, Dario-Lucas Helbing, Kathrin Finke, Philipp Reuken, Daniel Güllmar, Christian Gaser, et al. Cortical thickness alterations and systemic inflammation define long-covid patients with cognitive impairment. *Brain, Behavior, and Immunity*, 116:175–184, 2024.
